# Supplementary material
Source: PubMed Central journal article supplement (PMC4459828)
Supplement: NIHMS4693-supplement-supplement_1.pdf [file NIHMS4693-supplement-supplement_1.pdf]

**Table DS1 Clinical characteristics of the eight individuals with 22q11.2DS-Schizophrenia and seizures while on clozapine.**

| Seizures before clozapine | Seizures on clozapine           | Clozapine dose at seizure (mg) | Myoclonus | Electroencephalography findings                         |                                                                                                      |
|---------------------------|---------------------------------|--------------------------------|-----------|---------------------------------------------------------|------------------------------------------------------------------------------------------------------|
|                           |                                 |                                |           | Interictal epileptiform activity                        | Background                                                                                           |
| GTCS                      | GTCS (n=3), CPS (n=1), MS (n=1) | N/A                            | Yes       | Left temporal, generalized                              | Dysrhythmia grade IV, mild generalized disturbance                                                   |
| GTCS                      | GTCS (n=1)                      | 125                            | No        | Left parasagittal, temporal and right hemisphere spread | Normal                                                                                               |
| GTCS, FMS                 | GTCS (n=5)                      | 300-425                        | Yes       | None                                                    | Normal                                                                                               |
| -                         | GTCS (n>4)                      | 100-400                        | Yes       | Generalized                                             | 6-7Hz mild slowing                                                                                   |
| -                         | GTCS (n=2)                      | 250, <325                      | Yes       | Generalized                                             | 2-6 Hz polymorphic high amplitude mixed frequency slow wave activity, bi-hemispheric, severe slowing |
| -                         | GTCS (n=2)                      | 300, 400                       | Yes       | None                                                    | Generalized slowing                                                                                  |
| -                         | GTCS (n=2)                      | 350                            | No        | No EEG                                                  | No EEG                                                                                               |
| -                         | GTCS (n=1), MS                  | 275                            | Yes       | Generalized                                             | Normal, generalized low amplitude 15-25 Hz                                                           |

FMS, focal motor seizure; GTCS, generalized tonic-clonic seizures; IPGE, idiopathic primary generalized epilepsy; MS, myoclonic seizures; N/A, not available; CPS, complex partial seizures.

**Table DS2 Clozapine treatment-emergent adverse effects affecting <25% of patients with 22q11.2DS-associated schizophrenia (22q11.2DS-Schizophrenia) and idiopathic schizophrenia (Idiopathic-Schizophrenia).**

| Adverse effects                        | 22q11.2DS-Schizophrenia (n=20) |    | Idiopathic-Schizophrenia (n=20) |    | Novartis clinical trials <sup>22</sup> |
|----------------------------------------|--------------------------------|----|---------------------------------|----|----------------------------------------|
|                                        | N                              | %  | N                               | %  | %                                      |
| <b>Central nervous system</b>          |                                |    |                                 |    |                                        |
| Bradykinesia                           | 4 <sup>a,b</sup>               | 20 | 0                               | 0  | NR                                     |
| Fainting or drop attack                | 3                              | 15 | 1                               | 5  | 6                                      |
| Dysphagia                              | 3 <sup>b</sup>                 | 15 | 0                               | 0  | NR                                     |
| Headache                               | 3                              | 15 | 0                               | 0  | 7                                      |
| Freezing gait                          | 2 <sup>b</sup>                 | 10 | 0                               | 0  | NR                                     |
| Restlessness                           | 1                              | 5  | 1                               | 5  | 4                                      |
| Concentration problems                 | 1                              | 5  | 2                               | 10 | NR                                     |
| Weakness                               | 1                              | 5  | 1                               | 5  | 1                                      |
| <b>Cardiovascular</b>                  |                                |    |                                 |    |                                        |
| Hypertension                           | 2                              | 10 | 1                               | 5  | 4                                      |
| Hypotension                            | 2                              | 10 | 0                               | 0  | 9                                      |
| Chest pain/tightness                   | 1                              | 5  | 3                               | 15 | 1                                      |
| <b>Metabolic disturbances</b>          |                                |    |                                 |    |                                        |
| Type 2 diabetes mellitus               | 2                              | 10 | 3                               | 15 | 3 <sup>c</sup>                         |
| Hypercholesterolemia                   | 1                              | 5  | 2                               | 10 | NR                                     |
| Hyperlipidemia                         | 0                              | 0  | 1                               | 5  | NR                                     |
| <b>Gastrointestinal and urogenital</b> |                                |    |                                 |    |                                        |
| Constipation                           | 3                              | 15 | 4                               | 20 | 14                                     |
| Urinary incontinence                   | 3 <sup>b</sup>                 | 15 | 1                               | 5  | 1                                      |
| Nausea                                 | 3                              | 15 | 1                               | 5  | 5                                      |
| Vomiting                               | 3                              | 15 | 1                               | 5  | 3                                      |
| Urinary frequency                      | 1                              | 5  | 0                               | 0  | 1                                      |
| Bowel incontinence                     | 1 <sup>b</sup>                 | 5  | 0                               | 0  | NR                                     |
| Heartburn                              | 0                              | 0  | 1                               | 5  | <4                                     |
| Liver test abnormality                 | 0                              | 0  | 1                               | 5  | 1                                      |
| <b>Other</b>                           |                                |    |                                 |    |                                        |
| Yellow zone neutropenia <sup>d</sup>   | 4                              | 20 | 3                               | 15 | <3 <sup>e</sup>                        |
| Falls                                  | 1                              | 5  | 2                               | 10 | NR                                     |
| Facial edema                           | 1                              | 5  | 0                               | 0  | NR                                     |
| Dyspnea                                | 1                              | 5  | 1                               | 5  | 1                                      |
| Itchy feeling                          | 0                              | 0  | 1                               | 5  | NR                                     |

NR, not reported

<sup>a</sup>Includes one patient with pre-existing bradykinesia that worsened while on clozapine

<sup>b</sup>Includes one patient diagnosed with Parkinson's disease during the clozapine trial

<sup>c</sup>InterCePT study<sup>24</sup>

<sup>d</sup>White blood count (WBC)= $2.0-3.5 \times 10^9/L$  or absolute neutrophil count (ANC)= $1.5-2.0 \times 10^9/L$  or if a significant decline occurs in either count over a four week period e.g. a WBC decrease $\geq 3.0 \times 10^9/L$  or ANC decrease $\geq 1.5 \times 10^9/L$  <sup>e</sup>Includes leukopenia/decreased white blood cells/neutropenia
